# Supplementary material for: Solanum nigrum Fruit Extract Modulates Immune System Activity of Mealworm Beetle, Tenebrio molitor L.
Source: MDPI journal article supplement (doi:10.3390/toxins15010068), 2023-01-12
Supplement: s1 [file s1]

**Supplementary materials for: *Solanum nigrum* fruit extract  
modulates immune system activity of mealworm beetle, *Tenebrio  
molitor* L.**

**Table S1.** Primers used in the study

| Name                                                                                                                                                                                                                                           | Forward primer       | Reverse primer       | References         |
|------------------------------------------------------------------------------------------------------------------------------------------------------------------------------------------------------------------------------------------------|----------------------|----------------------|--------------------|
| <b>Cecropin</b>                                                                                                                                                                                                                                | ATGGACAACCAATGCCACCC | GGTCTTCGATTCCGTTGCCT | Jacobs et al. 2017 |
| <b>Tenecin-3</b>                                                                                                                                                                                                                               | CATCACGACGGACATCTGGG | TAAATGTCCGCCTGGTTGGC | Jacobs et al. 2017 |
| <b>Toll</b>                                                                                                                                                                                                                                    | TGCGTAGCAAACAGGTGGAT | TCGCGTAGCGGTAGTAGAGA | Jacobs et al. 2017 |
| <b>RPL13a</b>                                                                                                                                                                                                                                  | TCGTCGTGAGATGCGAACAA | CTGCTTCCCACGTTCTGTCT | Jacobs et al. 2017 |
| <b>References</b>                                                                                                                                                                                                                              |                      |                      |                    |
| Jacobs, C.G., J.D. Gallagher, S.E. Evison, D.G. Heckel, A. Vilcinskas, and H. Vogel. 2017. Endogenous egg immune defenses in the yellow mealworm beetle ( <i>Tenebrio molitor</i> ). <i>Developmental &amp; Comparative Immunology</i> 70:1-8. |                      |                      |                    |

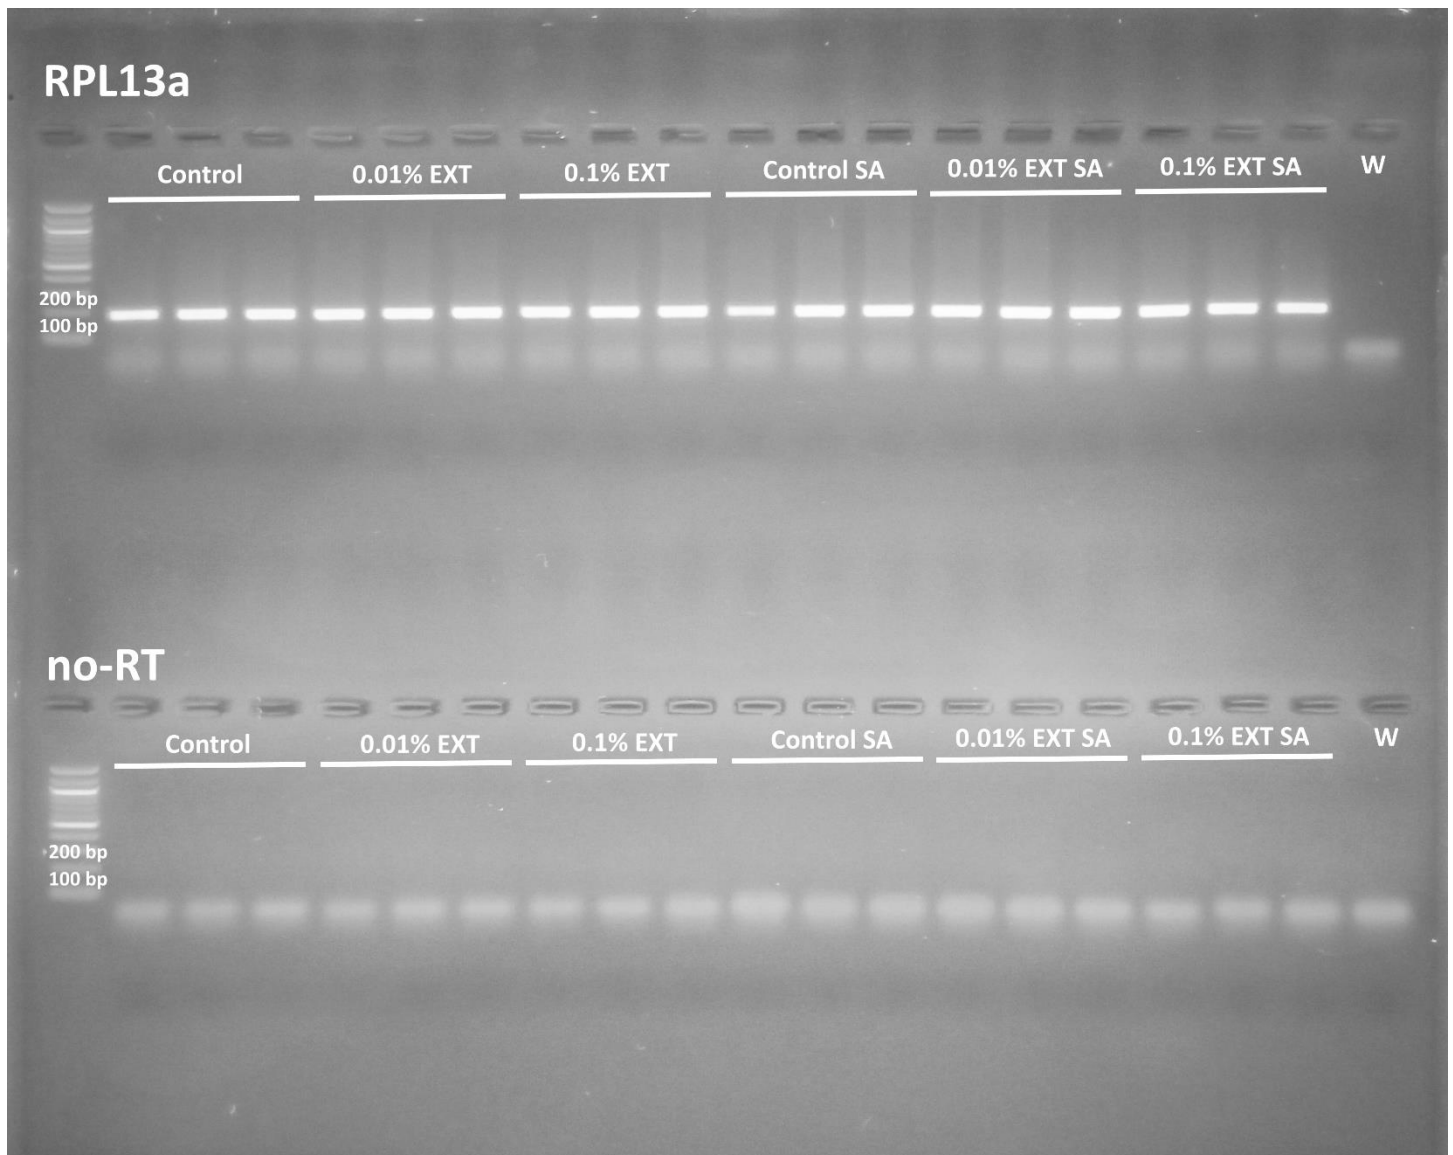

**Figure S1.** Positive and negative control for Reverse transcription quantitative PCR (RT-qPCR) analysis. The samples were checked using Reverse transcription PCR (RT PCR) method. Electrophoresis of RT PCR products was performed using a 2% TAE agarose gel stained with ethidium bromide. RPL13a - positive control of obtained samples; no-RT - negative control without using of reverse transcriptase during transcription of RNA to cDNA; Control - samples collected 24 hours after injection of physiological saline; 0.01% EXT - samples collected 24 hours after injection of physiological saline and *Solanum nigrum* fruit extract at concentration 0.01%; 0.1% EXT - samples collected 24 hours after injection of physiological saline and *Solanum nigrum* fruit extract at concentration 0.1%. Control SA - samples collected 24 hours after injection of physiological saline from additionally immunized beetles. 0.01% EXT SA- samples collected 24 hours after injection of physiological saline and *Solanum nigrum* fruit extract at concentration 0.01% from immunized beetles; 0.1% EXT SA- samples collected 24 hours after injection of physiological saline and *Solanum nigrum* fruit extract at concentration 0.1% from immunized beetles; W -water (no template control).
